# Supplementary material
Source: Springer Nature journal article supplement (https://www.springermedizin.de/resource/supplementary/12876_2013_1176_MOESM5_ESM.pdf/9438274)
Supplement: MOESM5 [file 9438274]

**Abdominal CT performed first  
(dynamic study recommended)**

**Overt, ongoing bleeding**

**Acute abdomen**

**Yes**

**No**

**No**

**Yes**

**Anterograde DBE,  
CE, angiography**

**Retrograde DBE, CE**

**Emergent  
surgery**

**← Detected**

**← Not detected →**

**Detected**

**Retrograde DBE**

**Not detected**

**Further work-up (small bowel series,  
Tc-99m pertechnetate scintigraphy, etc.)**

**Not detected**

**Detected**

**Meckel's diverticulectomy**

**Follow-up**
